# Supplementary material for: Stage and Gene Specific Signatures Defined by Histones H3K4me2 and H3K27me3 Accompany Mammalian Retina Maturation In Vivo
Source: PLoS One. 2012 Oct 9;7(10):e46867. doi: 10.1371/journal.pone.0046867 (PMC3467275; doi:10.1371/journal.pone.0046867)
Supplement: Table S6 — DAVID GO analysis for genes down-regulated during later retina development. (XLS) [file pone.0046867.s008.xls]

## Sheet: sTable 6
SupplementaryTable 6. DAVID GO analysis for genes down-regulated during later retina development
Cluster classification was based on H3K4me2 and H3K27me3 occupancies arround TSS through retina development from E17.5, PN1, PN7, and PN15 from Fig. 2b
Database for Annotation, Visualization and Integrated Discovery (DAVID) default setting for gene ontology (GO) was used for categories Biological Process (GOTERM_BP_FAT); Molecular Functions (GOTERM_MF_FAT); Cellular Component GOTERM_CC_FAT() analysis.
P Value was Fisher Exact P-Value (http://david.abcc.ncifcrf.gov/helps/functional_annotation.html#GC), Benjamini scores (p<0.05) were used for identification of significant enrichments
Other information please see http://david.abcc.ncifcrf.gov/
Cluster-1
Annotation Cluster 1	Enrichment Score: 0.9019413440726005
Category	Term	Count	%	PValue	Genes	List Total	Pop Hits	Pop Total	Fold Enrichment	Bonferroni	Benjamini	FDR
GOTERM_CC_FAT	GO:0044430~cytoskeletal part	3	25	0.0485868	MM.99961, MM.6442, MM.276251	7	774	12504	6.92359	0.796851	0.796851	35.038
GOTERM_CC_FAT	GO:0005856~cytoskeleton	3	25	0.0946155	MM.99961, MM.6442, MM.276251	7	1122	12504	4.77617	0.958442	0.796142	57.7196
GOTERM_CC_FAT	GO:0043228~non-membrane-bounded organelle	3	25	0.231674	MM.99961, MM.6442, MM.276251	7	1919	12504	2.79253	0.999783	0.939861	89.7969
GOTERM_CC_FAT	GO:0043232~intracellular non-membrane-bounded organelle	3	25	0.231674	MM.99961, MM.6442, MM.276251	7	1919	12504	2.79253	0.999783	0.939861	89.7969
Annotation Cluster 2	Enrichment Score: 0.5349754995474155
Category	Term	Count	%	PValue	Genes	List Total	Pop Hits	Pop Total	Fold Enrichment	Bonferroni	Benjamini	FDR
GOTERM_MF_FAT	GO:0030528~transcription regulator activity	3	25	0.193674	MM.228661, MM.295194, MM.246550	10	1206	13288	3.30547	0.999923	0.999923	86.6545
GOTERM_BP_FAT	GO:0006350~transcription	3	25	0.280725	MM.228661, MM.295194, MM.246550	9	1772	13588	2.55606	1	1	98.5977
GOTERM_MF_FAT	GO:0003677~DNA binding	3	25	0.344678	MM.228661, MM.295194, MM.246550	10	1781	13288	2.23829	1	0.999908	98.0822
GOTERM_BP_FAT	GO:0045449~regulation of transcription	3	25	0.386662	MM.228661, MM.295194, MM.246550	9	2227	13588	2.03383	1	1	99.8218
Cluster-2
Annotation Cluster 1	Enrichment Score: 1.3031908358037896
Category	Term	Count	%	PValue	Genes	List Total	Pop Hits	Pop Total	Fold Enrichment	Bonferroni	Benjamini	FDR
GOTERM_CC_FAT	GO:0005654~nucleoplasm	3	37.5	0.0208011	MM.287052, MM.3019, MM.273049	6	599	12504	10.4374	0.408748	0.408748	15.6794
GOTERM_CC_FAT	GO:0031981~nuclear lumen	3	37.5	0.0431585	MM.287052, MM.3019, MM.273049	6	883	12504	7.08041	0.668106	0.423897	30.0882
GOTERM_CC_FAT	GO:0070013~intracellular organelle lumen	3	37.5	0.0681765	MM.287052, MM.3019, MM.273049	6	1133	12504	5.51809	0.828864	0.444803	43.6107
GOTERM_CC_FAT	GO:0043233~organelle lumen	3	37.5	0.0685038	MM.287052, MM.3019, MM.273049	6	1136	12504	5.50352	0.83036	0.358227	43.7711
GOTERM_CC_FAT	GO:0031974~membrane-enclosed lumen	3	37.5	0.0727014	MM.287052, MM.3019, MM.273049	6	1174	12504	5.32538	0.848473	0.314357	45.7943
Annotation Cluster 2	Enrichment Score: 0.823849623305129
Category	Term	Count	%	PValue	Genes	List Total	Pop Hits	Pop Total	Fold Enrichment	Bonferroni	Benjamini	FDR
GOTERM_MF_FAT	GO:0003700~transcription factor activity	3	37.5	0.04366	MM.17709, MM.287052, MM.3019	7	776	13288	7.33873	0.808285	0.808285	33.0246
GOTERM_MF_FAT	GO:0030528~transcription regulator activity	3	37.5	0.0965232	MM.17709, MM.287052, MM.3019	7	1206	13288	4.7221	0.976615	0.84708	59.805
GOTERM_BP_FAT	GO:0006355~regulation of transcription, DNA-dependent	3	37.5	0.169364	MM.17709, MM.287052, MM.3019	8	1465	13588	3.47816	1	1	89.5816
GOTERM_BP_FAT	GO:0051252~regulation of RNA metabolic process	3	37.5	0.173711	MM.17709, MM.287052, MM.3019	8	1488	13588	3.4244	1	1	90.227
GOTERM_MF_FAT	GO:0003677~DNA binding	3	37.5	0.186638	MM.17709, MM.287052, MM.3019	7	1781	13288	3.19756	0.999521	0.921747	84.3532
GOTERM_BP_FAT	GO:0006350~transcription	3	37.5	0.229238	MM.17709, MM.287052, MM.3019	8	1772	13588	2.87556	1	1	95.8138
GOTERM_BP_FAT	GO:0045449~regulation of transcription	3	37.5	0.322405	MM.17709, MM.287052, MM.3019	8	2227	13588	2.28806	1	1	99.1292
Cluster-3
Annotation Cluster 1	Enrichment Score: 4.196491674464304
Category	Term	Count	%	PValue	Genes	List Total	Pop Hits	Pop Total	Fold Enrichment	Bonferroni	Benjamini	FDR
GOTERM_CC_FAT	GO:0030529~ribonucleoprotein complex	13	16.4557	1.49238e-07	MM.276802, MM.104368, MM.4742, MM.5291, MM.2050, MM.331491, MM.250030, MM.155896, MM.28275, MM.5286, MM.4071, MM.307846, MM.140380	50	462	12504	7.03688	2.13409e-05	1.06705e-05	0.000176741
GOTERM_MF_FAT	GO:0003735~structural constituent of ribosome	8	10.1266	1.85567e-06	MM.104368, MM.5286, MM.5291, MM.2050, MM.4071, MM.307846, MM.140380, MM.250030	53	151	13288	13.283	0.000259761	0.000259761	0.00218949
GOTERM_CC_FAT	GO:0005840~ribosome	8	10.1266	8.98136e-06	MM.104368, MM.5286, MM.5291, MM.2050, MM.4071, MM.307846, MM.140380, MM.250030	50	192	12504	10.42	0.00128352	0.000428022	0.010636
GOTERM_BP_FAT	GO:0006412~translation	9	11.3924	8.43011e-05	MM.294623, MM.104368, MM.5286, MM.5291, MM.2050, MM.4071, MM.307846, MM.140380, MM.250030	62	319	13588	6.18323	0.0345443	0.00389849	0.118231
GOTERM_MF_FAT	GO:0005198~structural molecule activity	9	11.3924	0.000330154	MM.104368, MM.5286, MM.5291, MM.2050, MM.4071, MM.307846, MM.273538, MM.140380, MM.250030	53	450	13288	5.01434	0.0451769	0.0228495	0.388855
GOTERM_CC_FAT	GO:0022626~cytosolic ribosome	3	3.79747	0.00221137	MM.104368, MM.5291, MM.140380	50	18	12504	41.68	0.271361	0.0513949	2.58773
GOTERM_CC_FAT	GO:0033279~ribosomal subunit	3	3.79747	0.0275184	MM.104368, MM.5291, MM.4071	50	66	12504	11.3673	0.981506	0.282888	28.141
Annotation Cluster 2	Enrichment Score: 4.064640237740472
Category	Term	Count	%	PValue	Genes	List Total	Pop Hits	Pop Total	Fold Enrichment	Bonferroni	Benjamini	FDR
GOTERM_BP_FAT	GO:0007049~cell cycle	17	21.519	7.06705e-09	MM.251794, MM.246551, MM.42196, MM.4502, MM.297440, MM.257181, MM.260114, MM.260103, MM.273538, MM.216101, MM.6839, MM.3488, MM.28038, MM.4189, MM.42203, MM.288179, MM.257590	62	611	13588	6.09778	2.94696e-06	2.94696e-06	9.91686e-06
GOTERM_BP_FAT	GO:0051301~cell division	10	12.6582	4.1163e-06	MM.6839, MM.3488, MM.28038, MM.4189, MM.42203, MM.297440, MM.260114, MM.288179, MM.257590, MM.260103	62	281	13588	7.79933	0.00171503	0.000857883	0.00577605
GOTERM_BP_FAT	GO:0000279~M phase	10	12.6582	4.36121e-06	MM.251794, MM.3488, MM.28038, MM.4189, MM.42203, MM.297440, MM.260114, MM.257590, MM.260103, MM.273538	62	283	13588	7.74422	0.00181698	0.000606026	0.00611971
GOTERM_BP_FAT	GO:0022402~cell cycle process	11	13.9241	8.82728e-06	MM.216101, MM.251794, MM.3488, MM.28038, MM.4189, MM.42203, MM.297440, MM.260114, MM.257590, MM.260103, MM.273538	62	393	13588	6.13429	0.00367423	0.000919825	0.0123862
GOTERM_BP_FAT	GO:0022403~cell cycle phase	10	12.6582	1.43245e-05	MM.251794, MM.3488, MM.28038, MM.4189, MM.42203, MM.297440, MM.260114, MM.257590, MM.260103, MM.273538	62	328	13588	6.68175	0.00595553	0.00119395	0.0200989
GOTERM_BP_FAT	GO:0000280~nuclear division	8	10.1266	2.15717e-05	MM.3488, MM.28038, MM.4189, MM.42203, MM.297440, MM.260114, MM.257590, MM.260103	62	190	13588	9.22784	0.00895517	0.00149813	0.0302663
GOTERM_BP_FAT	GO:0007067~mitosis	8	10.1266	2.15717e-05	MM.3488, MM.28038, MM.4189, MM.42203, MM.297440, MM.260114, MM.257590, MM.260103	62	190	13588	9.22784	0.00895517	0.00149813	0.0302663
GOTERM_BP_FAT	GO:0000087~M phase of mitotic cell cycle	8	10.1266	2.46703e-05	MM.3488, MM.28038, MM.4189, MM.42203, MM.297440, MM.260114, MM.257590, MM.260103	62	194	13588	9.03758	0.0102349	0.00146858	0.0346131
GOTERM_BP_FAT	GO:0048285~organelle fission	8	10.1266	2.72278e-05	MM.3488, MM.28038, MM.4189, MM.42203, MM.297440, MM.260114, MM.257590, MM.260103	62	197	13588	8.89995	0.0112899	0.00141826	0.0382006
GOTERM_BP_FAT	GO:0000278~mitotic cell cycle	8	10.1266	0.000105527	MM.3488, MM.28038, MM.4189, MM.42203, MM.297440, MM.260114, MM.257590, MM.260103	62	244	13588	7.18562	0.0430527	0.00439102	0.147979
GOTERM_CC_FAT	GO:0015630~microtubule cytoskeleton	9	11.3924	0.000325571	MM.251794, MM.30059, MM.3488, MM.28038, MM.42203, MM.260114, MM.260103, MM.273538, MM.154994	50	450	12504	5.0016	0.0454967	0.00926961	0.38489
GOTERM_CC_FAT	GO:0044430~cytoskeletal part	9	11.3924	0.00978493	MM.251794, MM.30059, MM.3488, MM.28038, MM.42203, MM.260114, MM.260103, MM.273538, MM.154994	50	774	12504	2.90791	0.754912	0.144644	10.9928
GOTERM_CC_FAT	GO:0005813~centrosome	4	5.06329	0.0246594	MM.251794, MM.30059, MM.260114, MM.260103	50	160	12504	6.252	0.971858	0.300263	25.5989
GOTERM_CC_FAT	GO:0005815~microtubule organizing center	4	5.06329	0.0376936	MM.251794, MM.30059, MM.260114, MM.260103	50	189	12504	5.2927	0.99589	0.34469	36.5572
GOTERM_CC_FAT	GO:0005856~cytoskeleton	9	11.3924	0.0684488	MM.251794, MM.30059, MM.3488, MM.28038, MM.42203, MM.260114, MM.260103, MM.273538, MM.154994	50	1122	12504	2.00599	0.999961	0.430669	56.8164
Annotation Cluster 3	Enrichment Score: 1.8452543417205198
Category	Term	Count	%	PValue	Genes	List Total	Pop Hits	Pop Total	Fold Enrichment	Bonferroni	Benjamini	FDR
GOTERM_BP_FAT	GO:0006259~DNA metabolic process	9	11.3924	0.000554981	MM.277779, MM.12553, MM.196290, MM.9199, MM.42196, MM.4502, MM.257181, MM.288179, MM.260103	62	421	13588	4.68516	0.20665	0.0208248	0.775968
GOTERM_BP_FAT	GO:0006281~DNA repair	5	6.32911	0.0175175	MM.277779, MM.196290, MM.42196, MM.288179, MM.260103	62	222	13588	4.93607	0.99937	0.388171	21.9635
GOTERM_BP_FAT	GO:0006974~response to DNA damage stimulus	5	6.32911	0.03978	MM.277779, MM.196290, MM.42196, MM.288179, MM.260103	62	287	13588	3.81814	1	0.571027	43.426
GOTERM_BP_FAT	GO:0033554~cellular response to stress	5	6.32911	0.107539	MM.277779, MM.196290, MM.42196, MM.288179, MM.260103	62	404	13588	2.71239	1	0.794322	79.74
Annotation Cluster 4	Enrichment Score: 1.5337241049492896
Category	Term	Count	%	PValue	Genes	List Total	Pop Hits	Pop Total	Fold Enrichment	Bonferroni	Benjamini	FDR
GOTERM_CC_FAT	GO:0005694~chromosome	9	11.3924	9.86571e-05	MM.207047, MM.117541, MM.3488, MM.29055, MM.15701, MM.28038, MM.257590, MM.29680, MM.260103	50	378	12504	5.95429	0.0140096	0.00352095	0.116776
GOTERM_CC_FAT	GO:0044427~chromosomal part	6	7.59494	0.00786933	MM.117541, MM.3488, MM.29055, MM.15701, MM.28038, MM.29680	50	318	12504	4.71849	0.676891	0.131702	8.93203
GOTERM_BP_FAT	GO:0034621~cellular macromolecular complex subunit organization	5	6.32911	0.0241539	MM.251013, MM.117541, MM.257181, MM.29680, MM.273538	62	245	13588	4.47268	0.999963	0.451053	29.0433
GOTERM_CC_FAT	GO:0000785~chromatin	4	5.06329	0.0266963	MM.117541, MM.29055, MM.15701, MM.29680	50	165	12504	6.06255	0.97913	0.296557	27.4183
GOTERM_BP_FAT	GO:0051276~chromosome organization	6	7.59494	0.0346379	MM.277779, MM.117541, MM.29055, MM.257181, MM.257590, MM.29680	62	404	13588	3.25487	1	0.5581	39.023
GOTERM_BP_FAT	GO:0034728~nucleosome organization	3	3.79747	0.0457026	MM.117541, MM.257181, MM.29680	62	76	13588	8.6511	1	0.587984	48.1306
GOTERM_BP_FAT	GO:0034622~cellular macromolecular complex assembly	4	5.06329	0.0737066	MM.251013, MM.117541, MM.29680, MM.273538	62	217	13588	4.03984	1	0.721153	65.8494
GOTERM_BP_FAT	GO:0043933~macromolecular complex subunit organization	5	6.32911	0.0823877	MM.251013, MM.117541, MM.257181, MM.29680, MM.273538	62	367	13588	2.98585	1	0.734971	70.0763
GOTERM_BP_FAT	GO:0006333~chromatin assembly or disassembly	3	3.79747	0.0860135	MM.117541, MM.29055, MM.29680	62	109	13588	6.03196	1	0.738012	71.6935
GOTERM_BP_FAT	GO:0006325~chromatin organization	4	5.06329	0.167893	MM.117541, MM.29055, MM.257181, MM.29680	62	315	13588	2.783	1	0.866933	92.4158
GOTERM_BP_FAT	GO:0065003~macromolecular complex assembly	4	5.06329	0.193673	MM.251013, MM.117541, MM.29680, MM.273538	62	338	13588	2.59362	1	0.893982	95.1234
Annotation Cluster 5	Enrichment Score: 1.3150482933004657
Category	Term	Count	%	PValue	Genes	List Total	Pop Hits	Pop Total	Fold Enrichment	Bonferroni	Benjamini	FDR
GOTERM_MF_FAT	GO:0003723~RNA binding	10	12.6582	0.00106808	MM.294623, MM.278922, MM.276802, MM.4742, MM.196290, MM.331491, MM.265610, MM.307846, MM.155896, MM.250030	53	672	13288	3.73091	0.138957	0.0486471	1.25298
GOTERM_BP_FAT	GO:0008380~RNA splicing	4	5.06329	0.0614761	MM.276802, MM.331491, MM.265610, MM.155896	62	201	13588	4.36142	1	0.667924	58.9476
GOTERM_CC_FAT	GO:0005681~spliceosome	3	3.79747	0.084886	MM.276802, MM.331491, MM.155896	50	124	12504	6.05032	0.999997	0.410537	65.0251
GOTERM_BP_FAT	GO:0006397~mRNA processing	4	5.06329	0.113257	MM.276802, MM.331491, MM.265610, MM.155896	62	262	13588	3.34597	1	0.801485	81.4874
GOTERM_BP_FAT	GO:0006396~RNA processing	5	6.32911	0.132583	MM.276802, MM.4742, MM.331491, MM.265610, MM.155896	62	437	13588	2.50757	1	0.834261	86.4112
GOTERM_BP_FAT	GO:0016071~mRNA metabolic process	4	5.06329	0.153819	MM.276802, MM.331491, MM.265610, MM.155896	62	302	13588	2.9028	1	0.871069	90.4032
Annotation Cluster 6	Enrichment Score: 1.1909622726834987
Category	Term	Count	%	PValue	Genes	List Total	Pop Hits	Pop Total	Fold Enrichment	Bonferroni	Benjamini	FDR
GOTERM_CC_FAT	GO:0005730~nucleolus	6	7.59494	0.00708558	MM.277779, MM.4742, MM.15701, MM.28038, MM.140380, MM.250030	50	310	12504	4.84026	0.638266	0.135206	8.0764
GOTERM_CC_FAT	GO:0031981~nuclear lumen	8	10.1266	0.0549701	MM.6839, MM.277779, MM.4742, MM.15701, MM.28038, MM.155896, MM.140380, MM.250030	50	883	12504	2.26573	0.999692	0.438701	48.8077
GOTERM_CC_FAT	GO:0070013~intracellular organelle lumen	9	11.3924	0.0716384	MM.6839, MM.277779, MM.4742, MM.15701, MM.28038, MM.155896, MM.140380, MM.250030, MM.154994	50	1133	12504	1.98651	0.999976	0.397205	58.5353
GOTERM_CC_FAT	GO:0043233~organelle lumen	9	11.3924	0.0725242	MM.6839, MM.277779, MM.4742, MM.15701, MM.28038, MM.155896, MM.140380, MM.250030, MM.154994	50	1136	12504	1.98127	0.999979	0.386991	59.0014
GOTERM_CC_FAT	GO:0031974~membrane-enclosed lumen	9	11.3924	0.0843394	MM.6839, MM.277779, MM.4742, MM.15701, MM.28038, MM.155896, MM.140380, MM.250030, MM.154994	50	1174	12504	1.91714	0.999997	0.421786	64.777
GOTERM_CC_FAT	GO:0005654~nucleoplasm	4	5.06329	0.418857	MM.6839, MM.277779, MM.15701, MM.155896	50	599	12504	1.66998	1	0.943562	99.8384
Annotation Cluster 7	Enrichment Score: 1.1013551216100854
Category	Term	Count	%	PValue	Genes	List Total	Pop Hits	Pop Total	Fold Enrichment	Bonferroni	Benjamini	FDR
GOTERM_MF_FAT	GO:0008201~heparin binding	3	3.79747	0.0417941	MM.207047, MM.906, MM.307846	53	83	13288	9.06206	0.997463	0.526271	39.5728
GOTERM_MF_FAT	GO:0005539~glycosaminoglycan binding	3	3.79747	0.0733266	MM.207047, MM.906, MM.307846	53	114	13288	6.59782	0.999977	0.694137	59.2837
GOTERM_MF_FAT	GO:0030247~polysaccharide binding	3	3.79747	0.0894356	MM.207047, MM.906, MM.307846	53	128	13288	5.87618	0.999998	0.73063	66.894
GOTERM_MF_FAT	GO:0001871~pattern binding	3	3.79747	0.0894356	MM.207047, MM.906, MM.307846	53	128	13288	5.87618	0.999998	0.73063	66.894
GOTERM_MF_FAT	GO:0030246~carbohydrate binding	4	5.06329	0.127007	MM.207047, MM.906, MM.271670, MM.307846	53	317	13288	3.16362	1	0.822488	79.8634
Annotation Cluster 8	Enrichment Score: 1.089826692737811
Category	Term	Count	%	PValue	Genes	List Total	Pop Hits	Pop Total	Fold Enrichment	Bonferroni	Benjamini	FDR
GOTERM_BP_FAT	GO:0017038~protein import	4	5.06329	0.00592726	MM.251013, MM.24937, MM.6932, MM.297440	62	82	13588	10.6908	0.916175	0.173615	8.00371
GOTERM_BP_FAT	GO:0033365~protein localization in organelle	4	5.06329	0.00941097	MM.251013, MM.24937, MM.6932, MM.297440	62	97	13588	9.03758	0.980609	0.245455	12.4259
GOTERM_BP_FAT	GO:0006605~protein targeting	4	5.06329	0.0218453	MM.251013, MM.24937, MM.6932, MM.297440	62	133	13588	6.59132	0.9999	0.437663	26.6511
GOTERM_MF_FAT	GO:0008565~protein transporter activity	3	3.79747	0.0274708	MM.251013, MM.6932, MM.15868	53	66	13288	11.3962	0.979752	0.47793	28.0114
GOTERM_BP_FAT	GO:0006886~intracellular protein transport	5	6.32911	0.0352395	MM.251013, MM.24937, MM.6932, MM.15868, MM.297440	62	276	13588	3.97031	1	0.54496	39.5541
GOTERM_BP_FAT	GO:0034613~cellular protein localization	5	6.32911	0.0450997	MM.251013, MM.24937, MM.6932, MM.15868, MM.297440	62	299	13588	3.6649	1	0.600034	47.6688
GOTERM_BP_FAT	GO:0070727~cellular macromolecule localization	5	6.32911	0.0460235	MM.251013, MM.24937, MM.6932, MM.15868, MM.297440	62	301	13588	3.64055	1	0.574393	48.3748
GOTERM_BP_FAT	GO:0046907~intracellular transport	5	6.32911	0.127858	MM.251013, MM.24937, MM.6932, MM.15868, MM.297440	62	431	13588	2.54247	1	0.83182	85.3348
GOTERM_BP_FAT	GO:0015031~protein transport	6	7.59494	0.167062	MM.251013, MM.24937, MM.6932, MM.15868, MM.297440, MM.257181	62	651	13588	2.01992	1	0.872567	92.3088
GOTERM_BP_FAT	GO:0045184~establishment of protein localization	6	7.59494	0.170772	MM.251013, MM.24937, MM.6932, MM.15868, MM.297440, MM.257181	62	656	13588	2.00452	1	0.864969	92.7758
GOTERM_BP_FAT	GO:0008104~protein localization	6	7.59494	0.248522	MM.251013, MM.24937, MM.6932, MM.15868, MM.297440, MM.257181	62	753	13588	1.74631	1	0.937386	98.1854
GOTERM_CC_FAT	GO:0031090~organelle membrane	4	5.06329	0.6226	MM.289702, MM.24937, MM.6932, MM.15868	50	809	12504	1.23649	1	0.987152	99.999
GOTERM_CC_FAT	GO:0031967~organelle envelope	3	3.79747	0.631341	MM.251013, MM.24937, MM.6932	50	540	12504	1.38933	1	0.984959	99.9993
GOTERM_CC_FAT	GO:0031975~envelope	3	3.79747	0.633378	MM.251013, MM.24937, MM.6932	50	542	12504	1.38421	1	0.983422	99.9993
Annotation Cluster 9	Enrichment Score: 0.7995807044458777
Category	Term	Count	%	PValue	Genes	List Total	Pop Hits	Pop Total	Fold Enrichment	Bonferroni	Benjamini	FDR
GOTERM_CC_FAT	GO:0005874~microtubule	4	5.06329	0.0675416	MM.251794, MM.42203, MM.273538, MM.154994	50	240	12504	4.168	0.999955	0.444697	56.3157
GOTERM_BP_FAT	GO:0000226~microtubule cytoskeleton organization	3	3.79747	0.0887159	MM.251794, MM.42203, MM.273538	62	111	13588	5.92328	1	0.737064	72.8455
GOTERM_BP_FAT	GO:0007017~microtubule-based process	3	3.79747	0.244621	MM.251794, MM.42203, MM.273538	62	211	13588	3.11604	1	0.93829	98.0486
GOTERM_BP_FAT	GO:0007010~cytoskeleton organization	3	3.79747	0.432127	MM.251794, MM.42203, MM.273538	62	326	13588	2.01682	1	0.984072	99.9644
Annotation Cluster 10	Enrichment Score: 0.5859914279677036
Category	Term	Count	%	PValue	Genes	List Total	Pop Hits	Pop Total	Fold Enrichment	Bonferroni	Benjamini	FDR
GOTERM_MF_FAT	GO:0000166~nucleotide binding	16	20.2532	0.0173997	MM.23695, MM.331491, MM.24337, MM.4502, MM.297440, MM.155896, MM.273538, MM.28275, MM.6839, MM.277779, MM.3488, MM.12553, MM.42203, MM.265610, MM.288179, MM.154994	53	2183	13288	1.8376	0.914342	0.459007	18.7066
GOTERM_MF_FAT	GO:0032555~purine ribonucleotide binding	10	12.6582	0.264498	MM.6839, MM.12553, MM.3488, MM.24337, MM.42203, MM.297440, MM.4502, MM.288179, MM.273538, MM.154994	53	1796	13288	1.39597	1	0.972236	97.3342
GOTERM_MF_FAT	GO:0032553~ribonucleotide binding	10	12.6582	0.264498	MM.6839, MM.12553, MM.3488, MM.24337, MM.42203, MM.297440, MM.4502, MM.288179, MM.273538, MM.154994	53	1796	13288	1.39597	1	0.972236	97.3342
GOTERM_MF_FAT	GO:0017076~purine nucleotide binding	10	12.6582	0.305977	MM.6839, MM.12553, MM.3488, MM.24337, MM.42203, MM.297440, MM.4502, MM.288179, MM.273538, MM.154994	53	1871	13288	1.34002	1	0.980424	98.6561
GOTERM_MF_FAT	GO:0005524~ATP binding	8	10.1266	0.333525	MM.6839, MM.12553, MM.3488, MM.24337, MM.42203, MM.4502, MM.288179, MM.154994	53	1443	13288	1.38998	1	0.977337	99.1667
GOTERM_MF_FAT	GO:0032559~adenyl ribonucleotide binding	8	10.1266	0.344714	MM.6839, MM.12553, MM.3488, MM.24337, MM.42203, MM.4502, MM.288179, MM.154994	53	1460	13288	1.37379	1	0.975239	99.3176
GOTERM_MF_FAT	GO:0030554~adenyl nucleotide binding	8	10.1266	0.394642	MM.6839, MM.12553, MM.3488, MM.24337, MM.42203, MM.4502, MM.288179, MM.154994	53	1535	13288	1.30667	1	0.983975	99.7321
GOTERM_MF_FAT	GO:0001883~purine nucleoside binding	8	10.1266	0.40335	MM.6839, MM.12553, MM.3488, MM.24337, MM.42203, MM.4502, MM.288179, MM.154994	53	1548	13288	1.29569	1	0.977746	99.7742
GOTERM_MF_FAT	GO:0001882~nucleoside binding	8	10.1266	0.410052	MM.6839, MM.12553, MM.3488, MM.24337, MM.42203, MM.4502, MM.288179, MM.154994	53	1558	13288	1.28738	1	0.975129	99.8024
GOTERM_MF_FAT	GO:0004674~protein serine/threonine kinase activity	3	3.79747	0.493972	MM.6839, MM.3488, MM.24337	53	421	13288	1.78658	1	0.989338	99.9677
Annotation Cluster 11	Enrichment Score: 0.4238281134497673
Category	Term	Count	%	PValue	Genes	List Total	Pop Hits	Pop Total	Fold Enrichment	Bonferroni	Benjamini	FDR
GOTERM_BP_FAT	GO:0045892~negative regulation of transcription, DNA-dependent	4	5.06329	0.160267	MM.4742, MM.29055, MM.15701, MM.260618	62	308	13588	2.84625	1	0.875204	91.3799
GOTERM_BP_FAT	GO:0051253~negative regulation of RNA metabolic process	4	5.06329	0.162434	MM.4742, MM.29055, MM.15701, MM.260618	62	310	13588	2.82789	1	0.871678	91.687
GOTERM_BP_FAT	GO:0016481~negative regulation of transcription	4	5.06329	0.233435	MM.4742, MM.29055, MM.15701, MM.260618	62	372	13588	2.35657	1	0.933046	97.6016
GOTERM_BP_FAT	GO:0045934~negative regulation of nucleobase, nucleoside, nucleotide and nucleic acid metabolic process	4	5.06329	0.263584	MM.4742, MM.29055, MM.15701, MM.260618	62	397	13588	2.20817	1	0.941295	98.6341
GOTERM_BP_FAT	GO:0051172~negative regulation of nitrogen compound metabolic process	4	5.06329	0.26846	MM.4742, MM.29055, MM.15701, MM.260618	62	401	13588	2.18615	1	0.941212	98.7557
GOTERM_BP_FAT	GO:0010629~negative regulation of gene expression	4	5.06329	0.279471	MM.4742, MM.29055, MM.15701, MM.260618	62	410	13588	2.13816	1	0.94542	98.9942
GOTERM_BP_FAT	GO:0010558~negative regulation of macromolecule biosynthetic process	4	5.06329	0.289299	MM.4742, MM.29055, MM.15701, MM.260618	62	418	13588	2.09724	1	0.948533	99.1705
GOTERM_BP_FAT	GO:0031327~negative regulation of cellular biosynthetic process	4	5.06329	0.304095	MM.4742, MM.29055, MM.15701, MM.260618	62	430	13588	2.03871	1	0.954284	99.3826
GOTERM_BP_FAT	GO:0009890~negative regulation of biosynthetic process	4	5.06329	0.309038	MM.4742, MM.29055, MM.15701, MM.260618	62	434	13588	2.01992	1	0.954181	99.4414
GOTERM_BP_FAT	GO:0010605~negative regulation of macromolecule metabolic process	4	5.06329	0.397905	MM.4742, MM.29055, MM.15701, MM.260618	62	506	13588	1.7325	1	0.981532	99.9191
GOTERM_BP_FAT	GO:0045449~regulation of transcription	11	13.9241	0.553341	MM.278922, MM.207047, MM.105331, MM.4742, MM.29055, MM.15701, MM.42196, MM.4189, MM.4502, MM.29680, MM.260618	62	2227	13588	1.08252	1	0.995179	99.9988
GOTERM_BP_FAT	GO:0006357~regulation of transcription from RNA polymerase II promoter	3	3.79747	0.770732	MM.207047, MM.15701, MM.260618	62	616	13588	1.06734	1	0.999845	100
GOTERM_BP_FAT	GO:0006355~regulation of transcription, DNA-dependent	5	6.32911	0.906821	MM.207047, MM.4742, MM.29055, MM.15701, MM.260618	62	1465	13588	0.747991	1	0.999999	100
GOTERM_BP_FAT	GO:0051252~regulation of RNA metabolic process	5	6.32911	0.913245	MM.207047, MM.4742, MM.29055, MM.15701, MM.260618	62	1488	13588	0.736429	1	0.999999	100
GOTERM_MF_FAT	GO:0030528~transcription regulator activity	3	3.79747	0.956323	MM.4742, MM.29055, MM.15701	53	1206	13288	0.623674	1	1	100
Annotation Cluster 12	Enrichment Score: 0.3734345906133025
Category	Term	Count	%	PValue	Genes	List Total	Pop Hits	Pop Total	Fold Enrichment	Bonferroni	Benjamini	FDR
GOTERM_CC_FAT	GO:0000267~cell fraction	5	6.32911	0.204209	MM.207047, MM.15868, MM.4071, MM.260114, MM.154994	50	596	12504	2.09799	1	0.715296	93.3139
GOTERM_CC_FAT	GO:0005624~membrane fraction	3	3.79747	0.599756	MM.15868, MM.4071, MM.260114	50	510	12504	1.47106	1	0.987282	99.998
GOTERM_CC_FAT	GO:0005626~insoluble fraction	3	3.79747	0.618937	MM.15868, MM.4071, MM.260114	50	528	12504	1.42091	1	0.988327	99.9989
Annotation Cluster 13	Enrichment Score: 0.35089542812479263
Category	Term	Count	%	PValue	Genes	List Total	Pop Hits	Pop Total	Fold Enrichment	Bonferroni	Benjamini	FDR
GOTERM_BP_FAT	GO:0006468~protein amino acid phosphorylation	5	6.32911	0.323541	MM.6839, MM.3488, MM.15701, MM.24337, MM.260114	62	640	13588	1.7122	1	0.959076	99.5852
GOTERM_MF_FAT	GO:0004672~protein kinase activity	4	5.06329	0.400822	MM.6839, MM.3488, MM.15701, MM.24337	53	583	13288	1.72019	1	0.981384	99.7627
GOTERM_BP_FAT	GO:0016310~phosphorylation	5	6.32911	0.404062	MM.6839, MM.3488, MM.15701, MM.24337, MM.260114	62	718	13588	1.52619	1	0.981632	99.9299
GOTERM_MF_FAT	GO:0004674~protein serine/threonine kinase activity	3	3.79747	0.493972	MM.6839, MM.3488, MM.24337	53	421	13288	1.78658	1	0.989338	99.9677
GOTERM_BP_FAT	GO:0006796~phosphate metabolic process	5	6.32911	0.550552	MM.6839, MM.3488, MM.15701, MM.24337, MM.260114	62	866	13588	1.26537	1	0.995387	99.9987
GOTERM_BP_FAT	GO:0006793~phosphorus metabolic process	5	6.32911	0.550552	MM.6839, MM.3488, MM.15701, MM.24337, MM.260114	62	866	13588	1.26537	1	0.995387	99.9987
Annotation Cluster 14	Enrichment Score: 0.2540908454508204
Category	Term	Count	%	PValue	Genes	List Total	Pop Hits	Pop Total	Fold Enrichment	Bonferroni	Benjamini	FDR
GOTERM_BP_FAT	GO:0010557~positive regulation of macromolecule biosynthetic process	4	5.06329	0.427047	MM.207047, MM.6839, MM.15701, MM.4189	62	530	13588	1.65405	1	0.984193	99.9597
GOTERM_BP_FAT	GO:0031328~positive regulation of cellular biosynthetic process	4	5.06329	0.453355	MM.207047, MM.6839, MM.15701, MM.4189	62	552	13588	1.58813	1	0.986993	99.9791
GOTERM_BP_FAT	GO:0009891~positive regulation of biosynthetic process	4	5.06329	0.459271	MM.207047, MM.6839, MM.15701, MM.4189	62	557	13588	1.57387	1	0.987035	99.9821
GOTERM_BP_FAT	GO:0010604~positive regulation of macromolecule metabolic process	4	5.06329	0.545592	MM.207047, MM.6839, MM.15701, MM.4189	62	633	13588	1.38491	1	0.995447	99.9984
GOTERM_BP_FAT	GO:0045941~positive regulation of transcription	3	3.79747	0.634371	MM.207047, MM.15701, MM.4189	62	475	13588	1.38418	1	0.998578	99.9999
GOTERM_BP_FAT	GO:0010628~positive regulation of gene expression	3	3.79747	0.649149	MM.207047, MM.15701, MM.4189	62	488	13588	1.3473	1	0.998793	100
GOTERM_BP_FAT	GO:0045935~positive regulation of nucleobase, nucleoside, nucleotide and nucleic acid metabolic process	3	3.79747	0.673099	MM.207047, MM.15701, MM.4189	62	510	13588	1.28918	1	0.99905	100
GOTERM_BP_FAT	GO:0051173~positive regulation of nitrogen compound metabolic process	3	3.79747	0.689693	MM.207047, MM.15701, MM.4189	62	526	13588	1.24997	1	0.999235	100
Annotation Cluster 15	Enrichment Score: 0.10711403436431219
Category	Term	Count	%	PValue	Genes	List Total	Pop Hits	Pop Total	Fold Enrichment	Bonferroni	Benjamini	FDR
GOTERM_CC_FAT	GO:0030054~cell junction	3	3.79747	0.554668	MM.335096, MM.289702, MM.1222	50	470	12504	1.59626	1	0.983939	99.9931
GOTERM_CC_FAT	GO:0044459~plasma membrane part	5	6.32911	0.898095	MM.335096, MM.289702, MM.1222, MM.140804, MM.273538	50	1633	12504	0.765707	1	0.999853	100
GOTERM_CC_FAT	GO:0005886~plasma membrane	8	10.1266	0.957861	MM.335096, MM.289702, MM.290834, MM.26700, MM.1222, MM.4071, MM.140804, MM.273538	50	2906	12504	0.688451	1	0.999991	100
Annotation Cluster 16	Enrichment Score: 0.007888767171850346
Category	Term	Count	%	PValue	Genes	List Total	Pop Hits	Pop Total	Fold Enrichment	Bonferroni	Benjamini	FDR
GOTERM_MF_FAT	GO:0008270~zinc ion binding	5	6.32911	0.974073	MM.277779, MM.274646, MM.15701, MM.42196, MM.29210	53	2105	13288	0.595527	1	1	100
GOTERM_MF_FAT	GO:0046872~metal ion binding	10	12.6582	0.982119	MM.289702, MM.277779, MM.3488, MM.274646, MM.15701, MM.42196, MM.26700, MM.271670, MM.288179, MM.29210	53	3850	13288	0.651213	1	1	100
GOTERM_MF_FAT	GO:0043169~cation binding	10	12.6582	0.983802	MM.289702, MM.277779, MM.3488, MM.274646, MM.15701, MM.42196, MM.26700, MM.271670, MM.288179, MM.29210	53	3885	13288	0.645346	1	1	100
GOTERM_MF_FAT	GO:0046914~transition metal ion binding	6	7.59494	0.984125	MM.277779, MM.274646, MM.15701, MM.42196, MM.271670, MM.29210	53	2608	13288	0.576803	1	1	100
GOTERM_MF_FAT	GO:0043167~ion binding	10	12.6582	0.985921	MM.289702, MM.277779, MM.3488, MM.274646, MM.15701, MM.42196, MM.26700, MM.271670, MM.288179, MM.29210	53	3934	13288	0.637308	1	1	100
